# Supplementary material for: Downregulation of microRNA‐124‐3p promotes subventricular zone neural stem cell activation by enhancing the function of BDNF downstream pathways after traumatic brain injury in adult rats
Source: PubMed Central journal article supplement (PMC9160452; doi:10.1111/cns.13845), 2022-04-28

## Full unedited gels for figure 5

Akt3

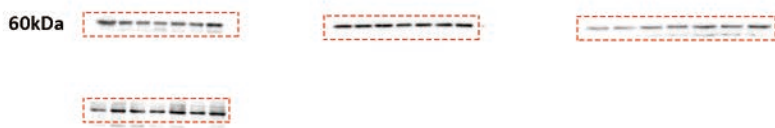

PI3K

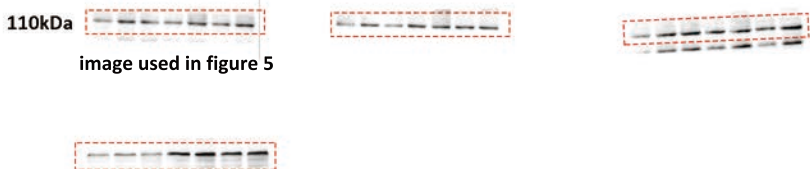

Ras

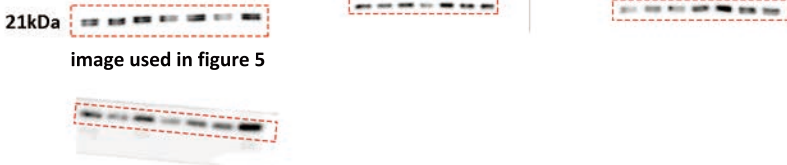

p-Mek

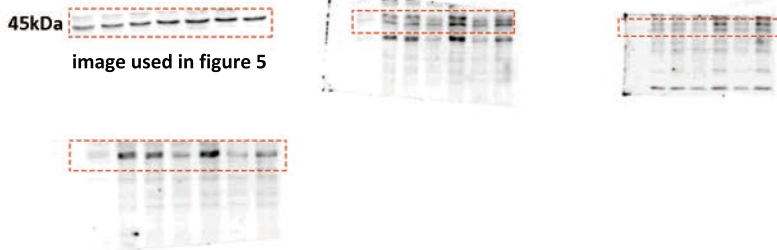

p-Akt

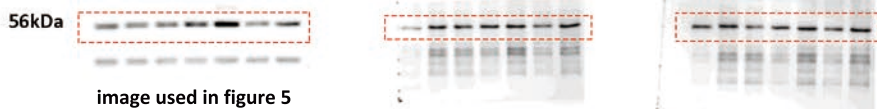

Supplement: CNS-28-1081-s001.pdf [file CNS-28-1081-s001.pdf]
